# Supplementary material for: Ru–Zn supported on hydroxyapatite as an effective catalyst for partial hydrogenation of benzene
Source: Royal Society of Chemistry journal article supplement (doi:10.1039/c2gc36596k), 2012-10-25
Supplement: c2gc36596k.pdf [file c2gc36596k.pdf]

Supporting information

## Ru-Zn supported on hydroxyapatite as effective catalysts for partial hydrogenation of benzene

Peng Zhang, Tianbin Wu, Tao Jiang, Weitao Wang, Huizhen Liu, Honglei Fan, Zhaofu Zhang,  
Buxing Han\*

*Beijing National Laboratory for Molecular Sciences (BNLMS), CAS Key Laboratory of Colloid and Interface and  
Thermodynamics, Institute of Chemistry, Chinese Academy of Sciences, Beijing 100190, China*

Tel./fax: +86 10 62562821. E-mail address: [Hanbx@iccas.ac.cn](mailto:Hanbx@iccas.ac.cn) (Buxing Han).

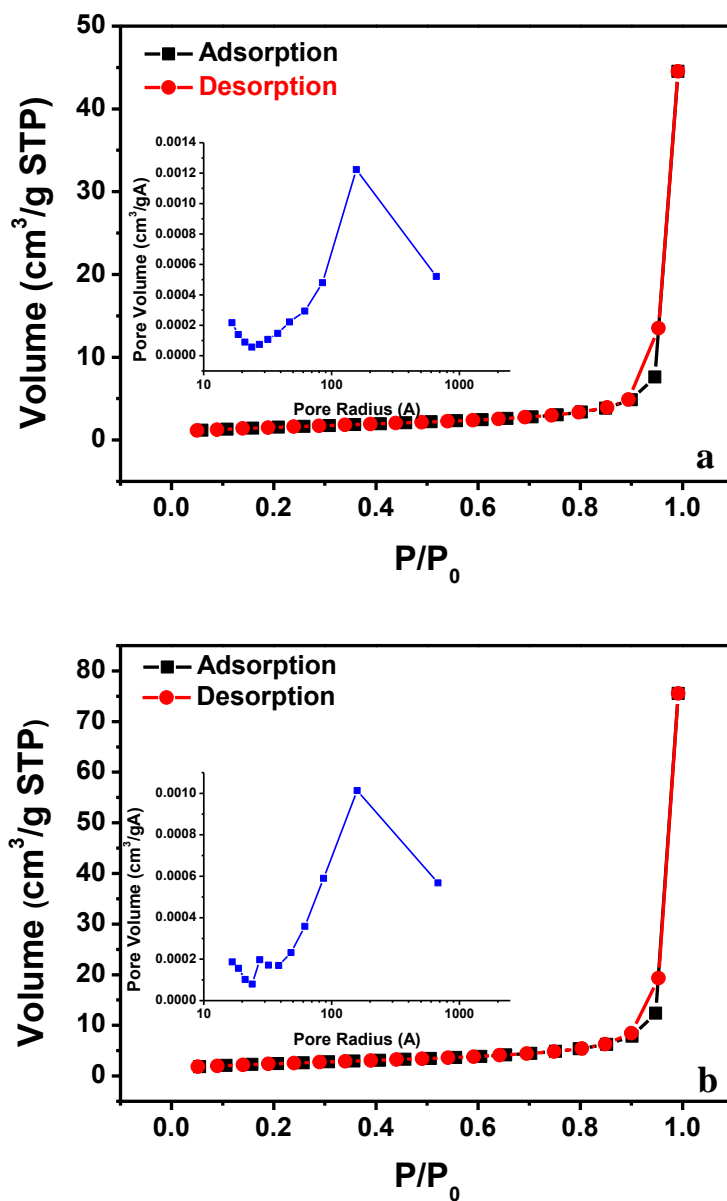

Fig. S1 N<sub>2</sub> physisorption isotherms and pore size distribution curves of  
a) hydroxyapatite (HAP) and b) Ru-Zn/HAP-1

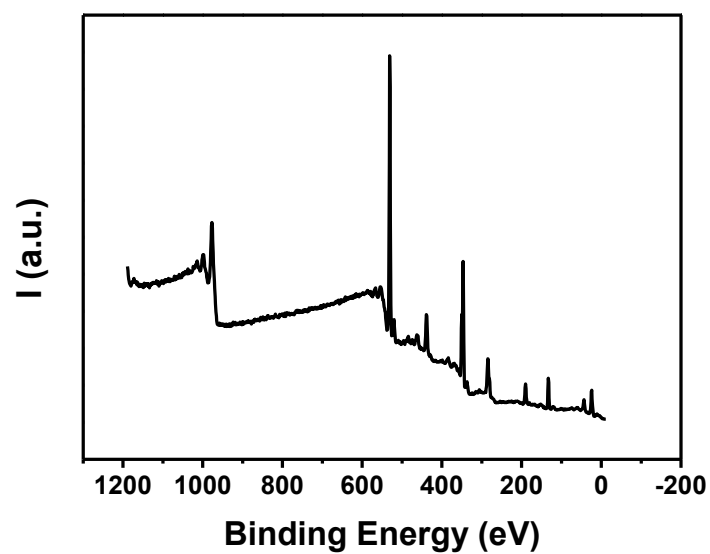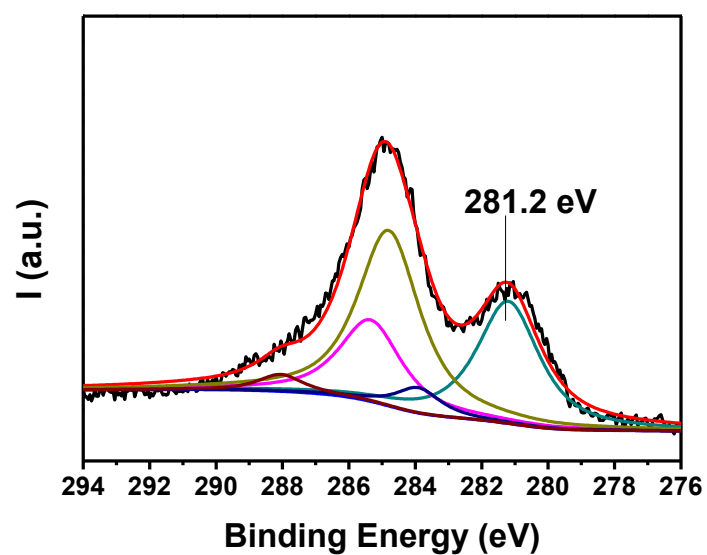

Fig. S2 XPS spectra of catalyst Ru/HAP

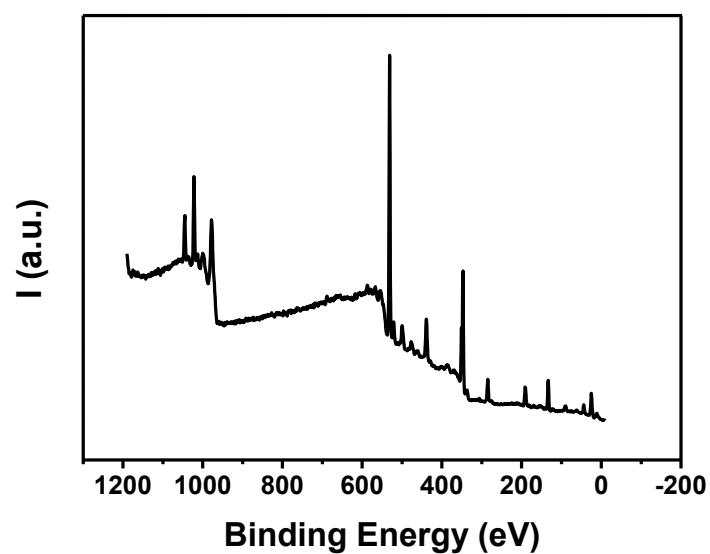

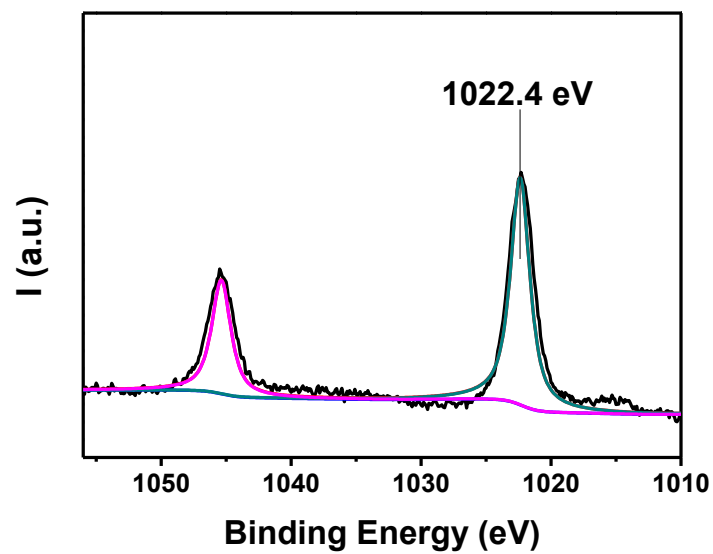

Fig. S3 XPS spectra of catalyst Zn/HAP

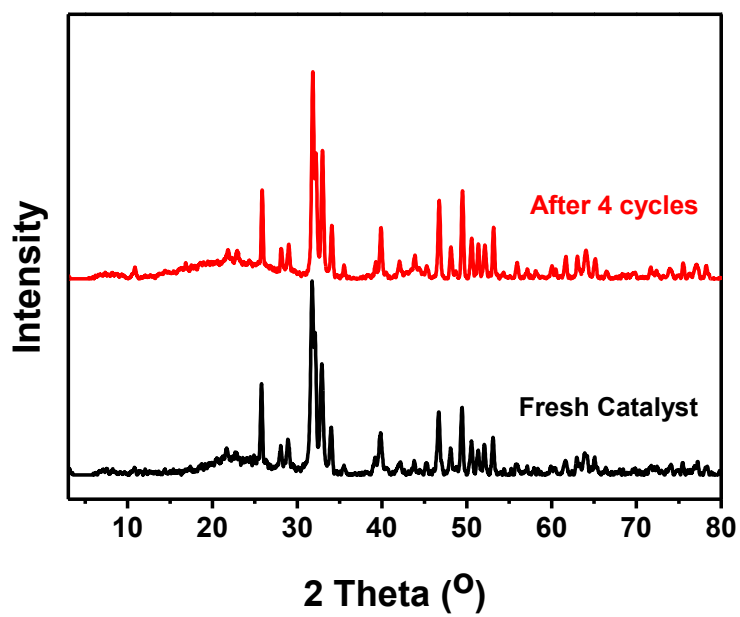

Fig. S4 XRD Patterns of fresh and used Ru-Zn/HAP-1
